# Supplementary material for: Early changes in photopic negative response in eyes with glaucoma with and without choroidal detachment after filtration surgery
Source: PubMed Central journal article supplement (PMC10447412; doi:10.1136/bjophthalmol-2021-320730), 2022-04-08

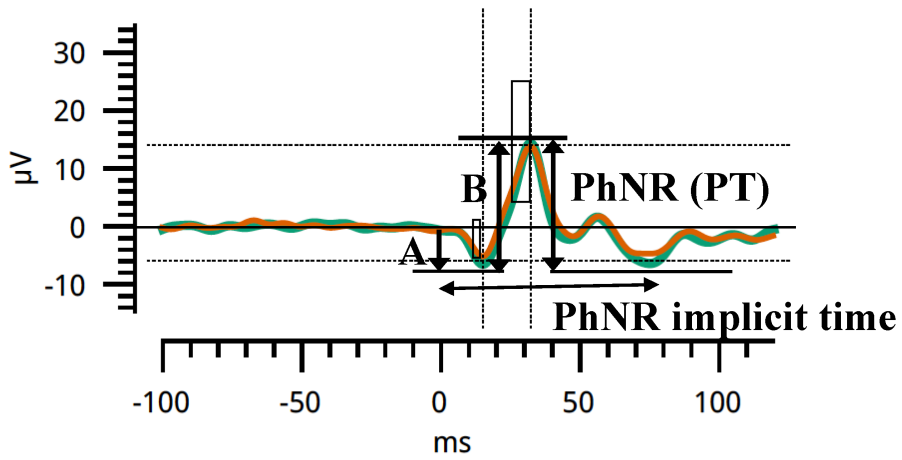

Supplement: bjophthalmol-2021-320730supp001.pdf [file bjophthalmol-2021-320730supp001.pdf]
