# Supplementary material for: Early changes in photopic negative response in eyes with glaucoma with and without choroidal detachment after filtration surgery
Source: PubMed Central journal article supplement (PMC10447412; doi:10.1136/bjophthalmol-2021-320730), 2022-04-08
Supplement: bjophthalmol-2021-320730supp002.pdf [file bjophthalmol-2021-320730supp002.pdf]

**Supplemental Table 1. Association Between Change in PhNR amplitude and Ocular Variables: Univariate and Multivariable Analysis. (preoperative IOP < 30mmHg)**

| Variables                                            | Change in PhNR amplitude, $\mu\text{V}$ |                  |                       |              |                       |              |
|------------------------------------------------------|-----------------------------------------|------------------|-----------------------|--------------|-----------------------|--------------|
|                                                      | Univariate model                        |                  | Multivariate model 1  |              | Multivariate model 2  |              |
|                                                      | Coefficients (95% CI)                   | P value          | Coefficients (95% CI) | P value      | Coefficients (95% CI) | P value      |
| Age (years) per 1 yr.                                | 0.06 (-0.10, 0.23)                      | 0.448            | 0.08 (-0.06, 0.22)    | 0.284        | 0.07 (-0.08, 0.22)    | 0.349        |
| Gender (Male / Female)                               | -0.85 (-4.08, 2.37)                     | 0.598            |                       |              |                       |              |
| CCT ( $\mu\text{m}$ ) per 1 $\mu\text{m}$            | 0.04 (-0.02, 0.09)                      | 0.170            |                       |              |                       |              |
| Axial Length (mm) per 1 mm                           | -0.37 (-1.26, 0.53)                     | 0.413            |                       |              |                       |              |
| Preoperative BCVA, log MAR, per 1 unit               | -2.46 (-8.01, 3.08)                     | 0.377            |                       |              |                       |              |
| Preoperative IOP per 1mmHg                           | 0.12 (-0.23, 0.48)                      | 0.500            |                       |              |                       |              |
| Preoperative MD value, per 1 dB                      | -0.12 (-0.42, 0.19)                     | 0.440            |                       |              |                       |              |
| Preoperative RNFL thickness, per 1 $\mu\text{m}$     | -0.07 (-0.20, 0.06)                     | 0.288            |                       |              |                       |              |
| Type of glaucoma surgery (Trabeculectomy / Ex-PRESS) | -0.99 (-4.13, 2.16)                     | 0.532            |                       |              |                       |              |
| Postoperative BCVA, log MAR, per 1 unit              | -0.94 (-6.3, 4.41)                      | 0.724            |                       |              |                       |              |
| Change in BCVA, log MAR, per 1 unit                  | 2.4 (-4.8, 9.6)                         | 0.506            |                       |              |                       |              |
| Postoperative IOP, per 1mmHg                         | 0.64 (0.22, 1.06)                       | <b>0.003</b>     | 0.35 (-0.07, 0.76)    | 0.099        | 0.34 (-0.09, 0.77)    | 0.118        |
| Change in IOP, per 1mmHg                             | -0.24 (-0.57, 0.09)                     | 0.147            |                       |              |                       |              |
| Postoperative CD (yes/no)                            | -7.33 (-10.73, -3.92)                   | <b>&lt;0.001</b> | -6.28 (-9.92, -2.63)  | <b>0.001</b> |                       |              |
| Postoperative CD (reference: no)                     |                                         |                  |                       |              |                       |              |
| Grade 1                                              | -7.61 (-14.72, -0.51)                   | <b>0.036</b>     |                       |              | -6.28 (-13.44, 0.87)  | 0.084        |
| Grade 2                                              | -5.73 (-10.86, -0.59)                   | <b>0.030</b>     |                       |              | -5.19 (-10.57, 0.20)  | 0.059        |
| Grade 3                                              | -8.78 (-13.92, -3.64)                   | <b>0.001</b>     |                       |              | -7.41 (-12.82, -2.00) | <b>0.008</b> |
| Past cataract surgery (yes/no)                       | 0.04 (-3.48, 3.55)                      | 0.984            |                       |              |                       |              |
| Past glaucoma surgery (yes/no)                       | 2.36 (-2.94, 7.66)                      | 0.375            |                       |              |                       |              |
| Past vitrectomy surgery (yes/no)                     | 6.3 (-1.69, 14.28)                      | 0.120            |                       |              |                       |              |
| Past cerebrovascular event (yes/no)                  | 1.46 (-5.28, 8.2)                       | 0.665            |                       |              |                       |              |
| Self-Reported Hypertension (yes/no)                  | -1.56 (-4.84, 1.71)                     | 0.342            |                       |              |                       |              |
| Self-Reported diabetes (yes/no)                      | 2.36 (-1.32, 6.03)                      | 0.203            |                       |              |                       |              |

**Abbreviations:**

PhNR, photopic negative response; CCT, central corneal thickness; BCVA, best-corrected visual acuity; IOP, intraocular pressure; MD, mean deviation; RNFL, retinal nerve fiber layer; CD, choroidal detachment
